# Supplementary material for: Male mating strategies to counter sexual conflict in spiders
Source: PubMed Central journal article supplement (PMC9163124; doi:10.1038/s42003-022-03512-8), 2022-06-02
Supplement: 42003_2022_3512_MOESM3_ESM.pdf [file 42003_2022_3512_MOESM3_ESM.pdf]

## Description of Additional Supplementary Files

**File name:** Supplementary Data 1

**Description:** The source data behind the graphs presented in the Figs. 1, 2, 3.
